# Supplementary material
Source: PubMed Central journal article supplement (PMC10097820)
Supplement: 41467_2023_37697_MOESM1_ESM.pdf [file 41467_2023_37697_MOESM1_ESM.pdf]

## Supplementary Fig.S1

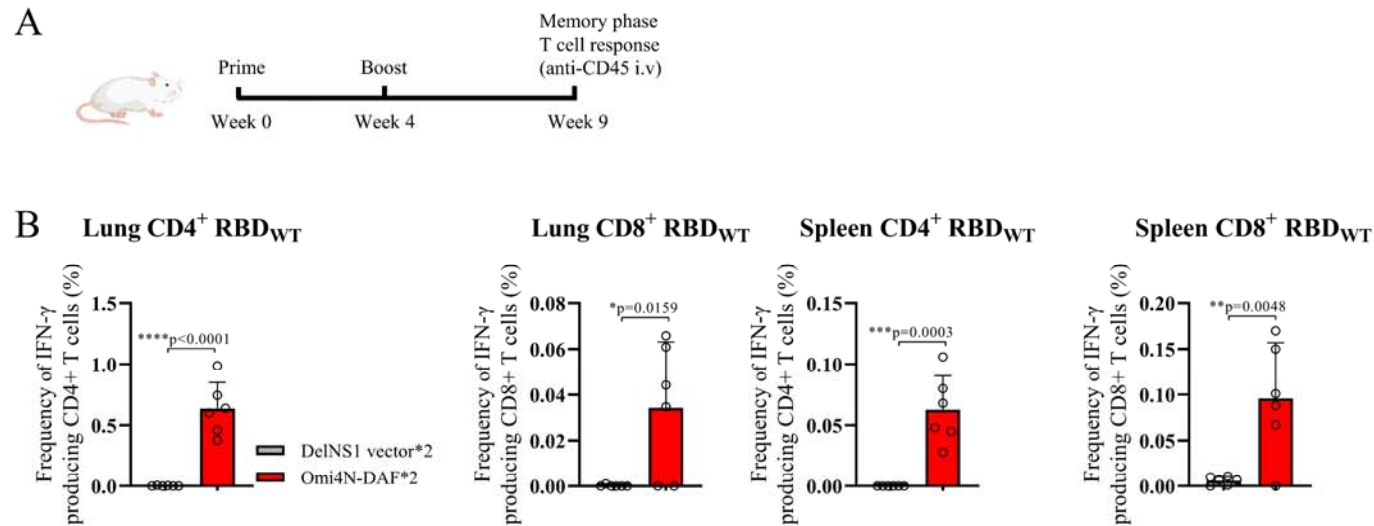

**Fig. S1 Memory CD4<sup>+</sup> and CD8<sup>+</sup> T cell response induced by DelNS1-RBD4N-DAF LAIV.**

(A) Schedule for immunization of BALB/c mice. At week 5 after the second immunization, 2  $\mu$ g of PerCP-Cy5.5 conjugated CD45-specific antibody was injected i.v. via the tail vein 5 min before sacrifice. Lung cells and splenocytes were obtained and stimulated with or without spike peptide pools (Supplementary Table 2) overnight in the presence of BFA. Surface markers (CD69, CD103, CD4, CD8 and Zombie) were stained, and cells then fixed and permeabilized. Intracellular IFN $\gamma$  was then stained with specific antibodies. (B) Omi4N-DAF induced tissue resident memory T (Trm) cell responses in lungs (CD45- IFN- $\gamma$ + CD69+ CD4+ T cells and CD45- IFN- $\gamma$ + CD69+ CD103+ CD8+ T cells) and spleens (CD45- IFN- $\gamma$ + CD4+ and CD8+ T cells). Percentages of T cell subsets in immunized mice ( $n = 6$  for each group) were compared. Error bars represent mean  $\pm$  SD. Statistical comparisons between means were performed by Student's t-test (2-tailed): \*\*\*\*  $p < 0.0001$ , \*\*\*  $p < 0.001$ , \*\*  $p < 0.01$ , \*  $p < 0.05$ . Mouse cartoons created with BioRender.com.

## Supplementary Fig.S2

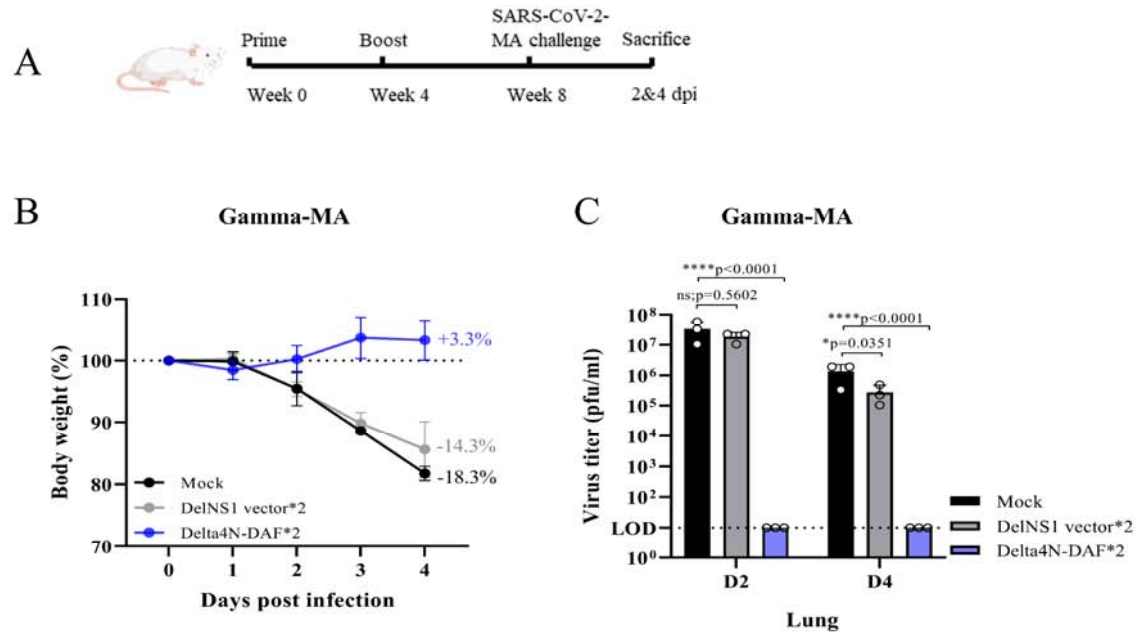

**Fig. S2 Protection against challenge with mouse-adapted SARS-CoV-2 Gamma strain (Gamma-MA) in mice prime-boost immunized with DelNS1-RBD4N-DAF vaccine.**

(A) Illustration of schedule of immunization and SARS-CoV-2 virus challenge for BALB/c mice. Mice were intranasally prime-boost vaccinated with Delta4N-DAF ( $2 \times 10^6$  pfu), DelNS1 vector ( $2 \times 10^6$  pfu) or PBS ( $n=6$  for each group) and then challenged with the mouse-adapted SARS-CoV-2 strain Gamma-MA ( $5 \times 10^4$  pfu) 4 weeks after boost immunization. (B) Body weight changes over time. ( $n=6$  for each group). (C) Virus titers in the lungs were measured at 2 dpi ( $n=3$  for each group) and 4 dpi ( $n=6$  for each group). LOD: lower limit of detection. Error bars represent mean  $\pm$  SD. Statistical analysis was performed using one-way ANOVA followed by Dunn's multiple comparisons test: \*\*\*\*  $p < 0.0001$ , \*  $p < 0.05$ , ns: not significant. Mouse cartoon created with BioRender.com.

## Supplementary Fig.S3

A

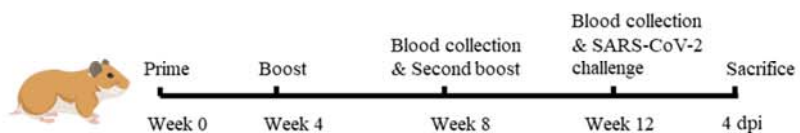

| Regimen       | Prime          | Boost          | Second Boost                 |
|---------------|----------------|----------------|------------------------------|
| Mock          | /              | /              | /                            |
| BNT*2         | BNT162b2(i.m.) | BNT162b2(i.m.) | /                            |
| BNT*3         | BNT162b2(i.m.) | BNT162b2(i.m.) | BNT162b2(i.m.)               |
| BNT*2+Delta4N | BNT162b2(i.m.) | BNT162b2(i.m.) | CA4-DelNS1-Delta4N-DAF(i.n.) |
| BNT*2+Omi4N   | BNT162b2(i.m.) | BNT162b2(i.m.) | CA4-DelNS1-Omi4N-DAF(i.n.)   |

B Anti-RBD<sub>WT</sub> IgG-Hamster

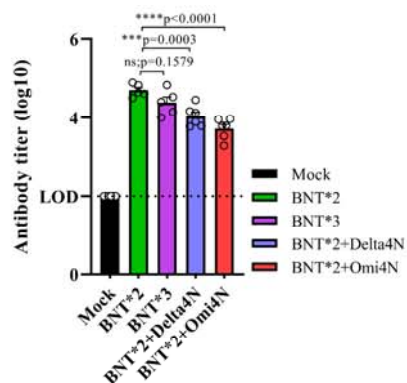

C Pseudovirus nAb-Hamster

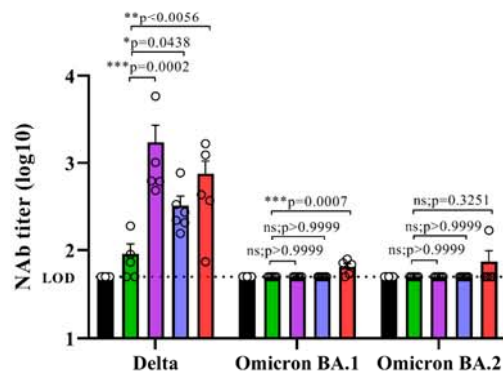

D Delta

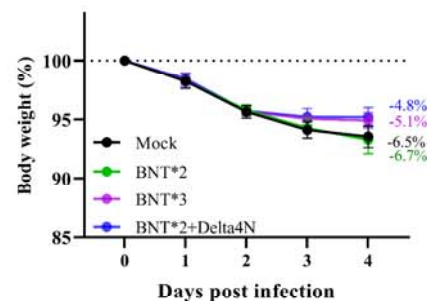

E Delta

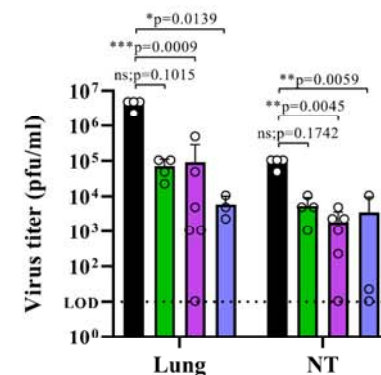

F Omicron BA.1

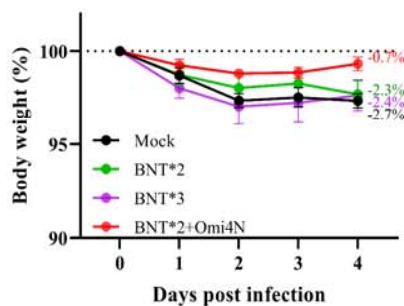

G Omicron BA.1

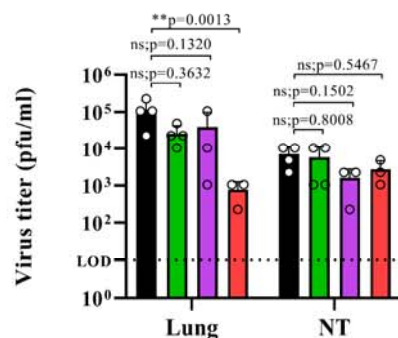

H Omicron BA.2

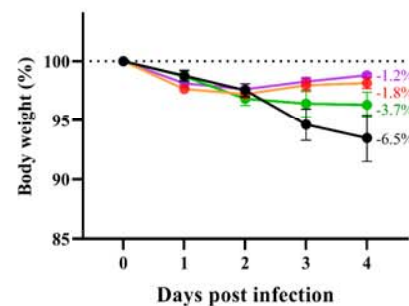

I Omicron BA.2

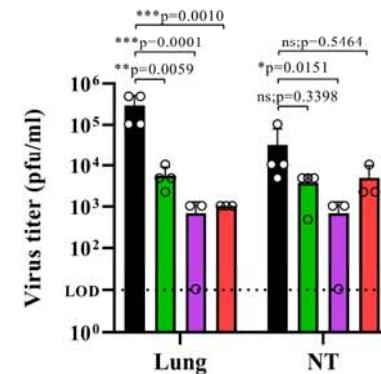

**Fig. S3 Protective efficacy of DelNS1-RBD4N-DAF LAIVs when used as “mix and match” boosters following two doses of BNT162b2 mRNA vaccine in hamsters.**

(A) Hamsters were vaccinated using different regimens: two doses of BNT162b2 mRNA vaccine (BNT\*2), three doses of BNT162b2 mRNA vaccine (BNT\*3), two doses of BNT162b2 mRNA vaccine with a third dose of the Delta4N-DAF (BNT\*2+Delta4N) or two doses of BNT162b2 mRNA vaccine with a third dose of the Omi4N-DAF (BNT\*2+Omi4N). Sera samples were collected 14 days after the last immunization and tested for (B) anti-S1 RBD-specific IgG titers (BNT\*2 (n=5), BNT\*3 (n=5), BNT\*2+Delta4N (n=6), BNT\*2+ Omi4N (n=6) and mock (n=6)), (C) neutralization titers against pseudotyped viruses displaying Delta, Omicron BA.1 or Omicron BA.2 spike proteins (BNT\*2 (n=5), BNT\*3 (n=5), BNT\*2+Delta4N (n=6), BNT\*2+Omi4N (n=5) and mock (n=5)). Hamsters were challenged with Delta, Omicron BA.1 or Omicron BA.2 SARS-CoV-2 variants at  $1 \times 10^4$  pfu per hamster 4 weeks after their last immunization. (D, F and H) Body weight changes following SARS-CoV-2 virus challenge of hamsters immunized according to the different vaccine regimens. (E, G and I) Virus titers in the lungs and nasal turbinates (NT) of hamsters were measured at 4 dpi. LOD: lower limit of detection. Error bars represent mean  $\pm$  SD. Statistical comparisons between means were performed by Student's t-test (2-tailed): \*\*\*\*  $p < 0.0001$ , \*\*\*  $p < 0.001$ , \*\*  $p < 0.01$ , \*  $p < 0.05$ , ns: not significant. Mouse cartoon created with BioRender.com.

## Supplementary Fig.S4

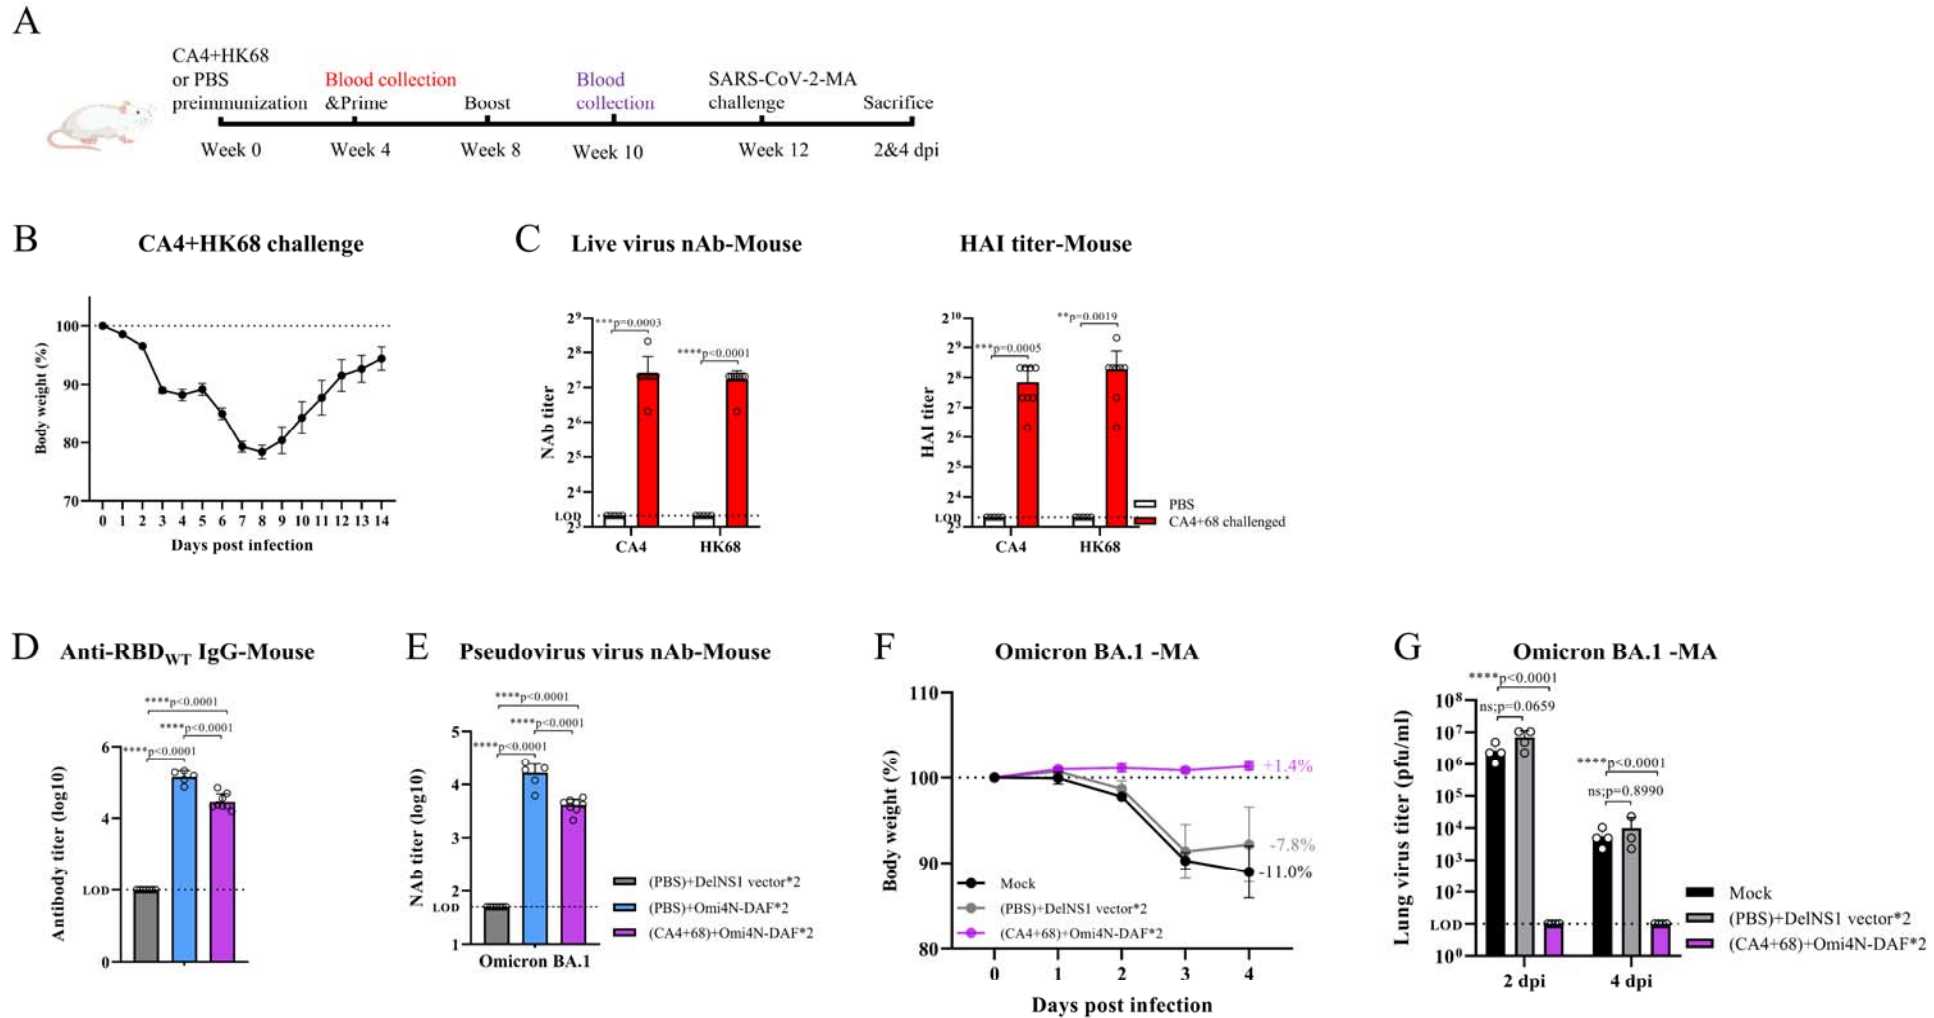

**Fig. S4 Effect of pre-existing anti-influenza immunity on the immunogenicity and protective ability of Omicron DelNS1-RBD4N-DAF LAIV.**

(A) Schedule for preimmunization, immunization and virus challenge of BALB/c mice. Mice were challenged with a sublethal dose containing both wild type CA4 and HK68 viruses ( $2 \times 10^4$  pfu of each virus per mouse) or control PBS (n=8 for each group). (B) Body weight and disease symptoms were monitored for 2 weeks. (C) At week 4 post infection, sera were collected for testing of neutralization titers and hemagglutination inhibition (HAI) titers against live influenza viruses CA4 (H1N1) or HK68 (H3N2). Starting at week 4 after preimmunization, mice were intranasally prime-boost vaccinated 4 weeks apart with  $2 \times 10^6$  pfu of Omi4N-DAF or DelNS1 vector ((PBS)+DelNS1 vector (n=7), (PBS)+Omi4N-DAF (n=5), (CA4+68)+Omi4N-DAF (n=8)). Sera were collected 14 days after the second immunization for (D) testing of anti-S1 RBD-specific IgG titers, and (E) neutralization titers against pseudotyped viruses displaying Omicron BA.1 spike proteins. The mice were then challenged with Omicron-MA 4 weeks after boost immunization. (F) Body weight and disease symptoms were monitored for 4 days. (G) Virus titers in the lungs were measured at 2 dpi and 4 dpi. LOD: lower limit of detection. Error bars represent mean  $\pm$  SD. Statistical analysis for (C) was performed by Student's t-test (2-tailed), and statistical analysis for (D), (E) and (G) was performed by one-way ANOVA with Dunn's multiple comparisons test: \*\*\*\* p < 0.0001, \*\*\* p < 0.001, \*\* p < 0.01, ns: not significant. Mouse cartoon created with BioRender.com.

Supplementary Fig.S5

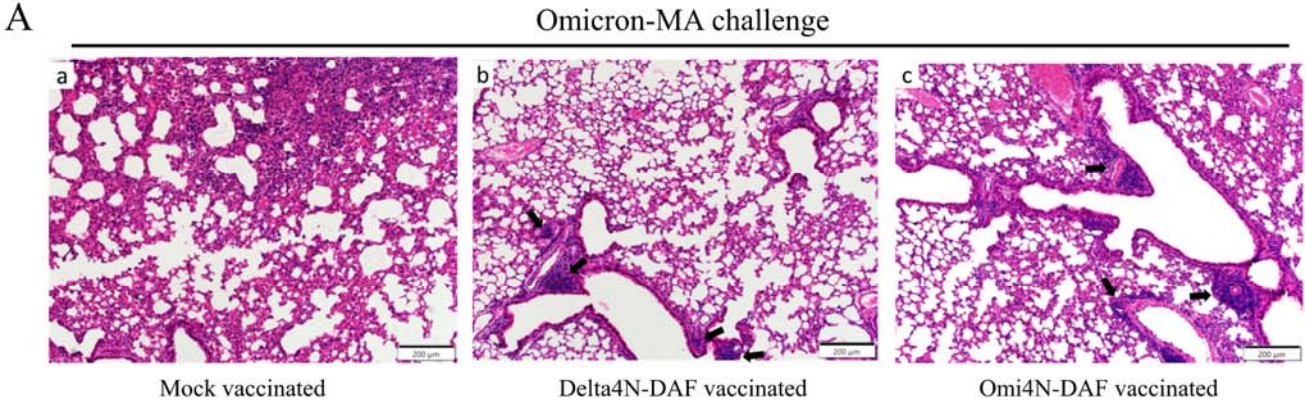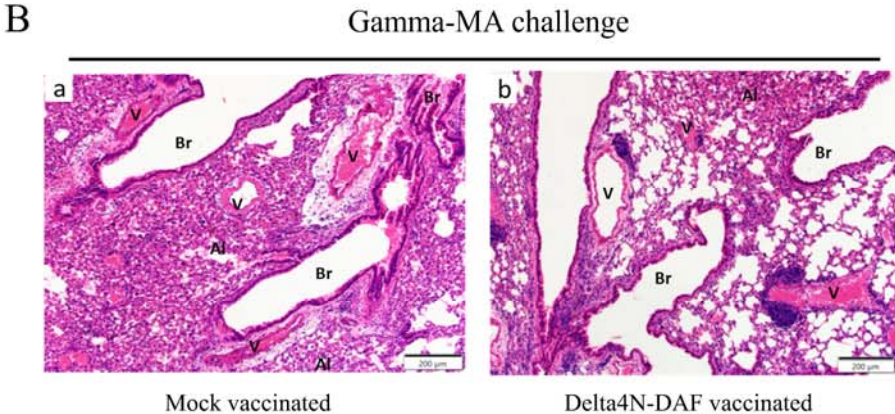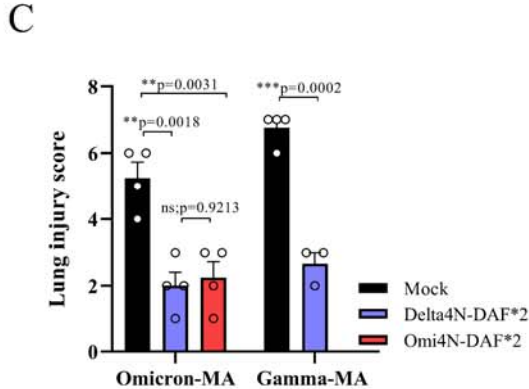

**Fig. S5 Histopathological analysis of lung pathology in immunized-challenged mice.**

Mice were intranasally prime-boost vaccinated with Delta4N-DAF ( $2 \times 10^6$  pfu), Omi4N-DAF ( $2 \times 10^6$  pfu) or PBS (Mock) (n=4 for each group). Four weeks after boost immunization, mice were challenged with the mouse-adapted SARS-CoV-2 strains Omicron-MA ( $1 \times 10^5$  pfu) or Gamma-MA ( $5 \times 10^4$  pfu) (n=4 for each group). Lungs were collected, fixed, processed into paraffin blocks, and sections H&E stained at 4 dpi. (A) Mock-vaccinated or immunized mice challenged with Omicron-MA virus. a. The lung mainly showed alveolar wall thickening due to increased immune cell infiltration and alveolar septum vessel congestion. b. The lung section showed foci of infiltrating immune cells around the bronchioles (arrows); the alveolar structure appeared normal. c. The lung section appeared to have a largely normal alveolar structure. Several foci of immune cells were observed around the blood vessels (arrows). (B) Mock-vaccinated or immunized mice challenged with Gamma-MA virus. a. The lung mainly showed alveolar wall edema and mild alveolar space infiltration with mononucleated cells. Severe to mild perivascular edema (V) and with some immune cell infiltration was also seen. Bronchial epithelium damage and infiltration were mild (Br). b. The lung section showed a patchy area of alveolar infiltration (Al), and several foci of infiltrating immune cells around the blood vessels (V). The bronchioles showed mild infiltration while the epithelium was largely normal (Br). Br, Bronchiole; V, blood vessel, Al, alveolar structure. (C) The lung sections were quantitatively evaluated for histopathological damage to the structure of bronchioles, alveoli and pulmonary blood vessels. Scores were given to compare the severity of lung damage between different mice. A score of 0-3 was given for each category of damage, and the highest total score for each sample was calculated (highest possible total score = 9). Scale bar: 200  $\mu$ m. Images are representative of three independent experiments. Error bars represent mean  $\pm$  SD. Statistical analysis was performed using one-way ANOVA followed by Dunn's multiple comparisons test: \*\*\*  $p < 0.001$ , \*\*  $p < 0.01$ , ns: not significant. Hamster cartoon created with BioRender.com.



## Supplementary Fig.S6

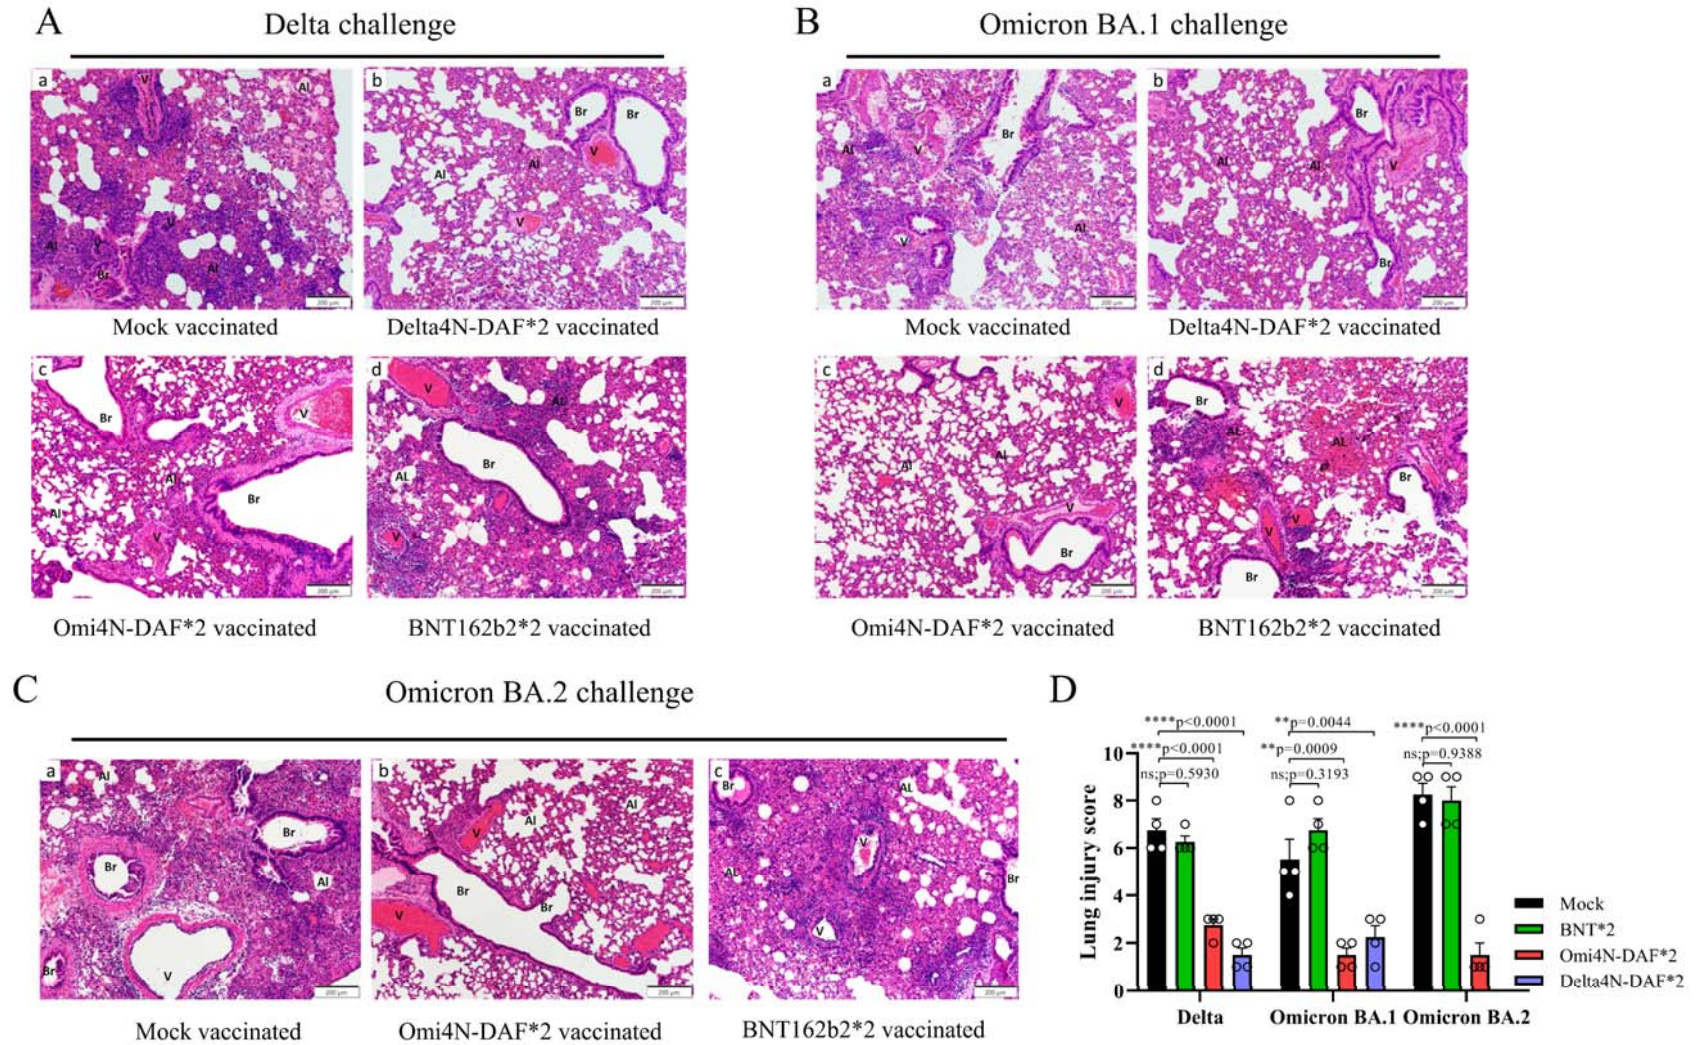

**Fig. S6 Histopathological analysis of lung pathology in immunized-challenged hamsters.**

Hamsters were prime-boost vaccinated intranasally with Delta4N-DAF ( $2 \times 10^6$  pfu), Omi4N-DAF ( $2 \times 10^6$  pfu) or PBS (Mock) or intramuscularly with BNT162b2 mRNA (n=4 for each group). Four weeks after boost immunization, hamsters were challenged with  $1 \times 10^4$  pfu of the SARS-CoV-2 variants Delta, Omicron BA.1 or Omicron BA.2 (n=4 for each group). Lungs were collected, fixed, processed into paraffin blocks, and sections H&E stained at 4 dpi. (A) Mock-vaccinated or immunized hamsters challenged with Delta virus. a. The image of the lung at day 4 post infection showed diffuse histopathological changes, including a larger area of alveolar consolidation with immune cell infiltration and alveolar space exudation. A bronchial section (Br) showed epithelium detached in the lumen; three pulmonary blood vessel sections (V) showed severe perivascular and endothelial immune cell infiltration. b. The lung section showed two bronchial sections (Br) with no obvious epithelial damage or immune cell infiltration; the blood vessels (V) showed no indication of inflammatory infiltration. The alveolar wall (Al) showed blood vessel congestion, but no consolidation. c. A mild degree of peribranchial infiltration (Br) and alveolar septum infiltration (Al) was observed, while blood vessels appeared normal. d. The image shows a larger area of alveolar (Al) consolidation with immune cell infiltration and alveolar space exudation. A bronchial section (Br) showed a mild degree of luminal cell debris. The two pulmonary blood vessel sections (V) showed perivascular and mild to moderate endothelial immune cell infiltration. (B) Mock-vaccinated or immunized hamsters challenged with Omicron BA.1 virus. a. A larger area of alveolar (Al) immune cell infiltration and alveolar space exudation. A bronchial section (Br) displayed peribronchiolar infiltration and luminal cell debris. Two sections of pulmonary blood vessels (V) showed mild inflammatory changes and vessel wall infiltration. b. The lung section showed bronchial infiltration and luminal cell debris (Br); the blood vessel (V) showed no appearance of inflammatory infiltration. The alveolar wall (Al) showed blood vessel congestion, but no alveolar space infiltration or exudation. c. The lung section appeared largely normal. d. The Omicron BA.1 challenged lung showed vessel congestion and a patchy area of alveolar (Al) hemorrhage and immune cell infiltration, together with a mild degree of bronchial luminal cell debris (Br) and perivascular immune cell infiltration (V). (C) Mock-vaccinated or immunized hamsters challenged with Omicron BA.2 virus. a. A larger area of alveolar (Al) consolidation due to immune cell infiltration and alveolar space exudation. Bronchial epithelium desquamation with luminal cell debris is shown in the three sections (Br). A large blood vessel (V) showed perivascular edema, infiltration and a moderate degree of infiltration. b. Beside congestion of the large blood vessel (V), the alveolar and bronchial structures are largely normal. c. Diffuse alveolar (Al) consolidation. Severe perivascular and endothelial infiltration (V) were observed in the two pulmonary blood vessels. Though the bronchial lumen is filled with hemorrhagic secretions, epithelial damage is less obvious. Br, bronchiole; V, blood vessel, Al, alveolar structure. Scale bar: 200  $\mu$ m. Images are representative of three independent experiments. (D) The lung sections were quantitatively evaluated for histopathological damage to the structure of bronchioles, alveoli and pulmonary blood vessels. Scores were given to compare the severity lung damages in different hamsters. A score of 0-3 was given to each category of damage, and the highest total score for each sample was calculated (highest possible total score = 9). Scale bar: 200  $\mu$ m. Images are representative of three independent experiments. Error bars represent mean  $\pm$  SD. Statistical analysis was performed using one-way ANOVA followed by Dunn's multiple comparisons test: \*\*\*\*  $p < 0.0001$ , \*\*  $p < 0.01$ , ns: not significant.

## Supplementary Fig.S7

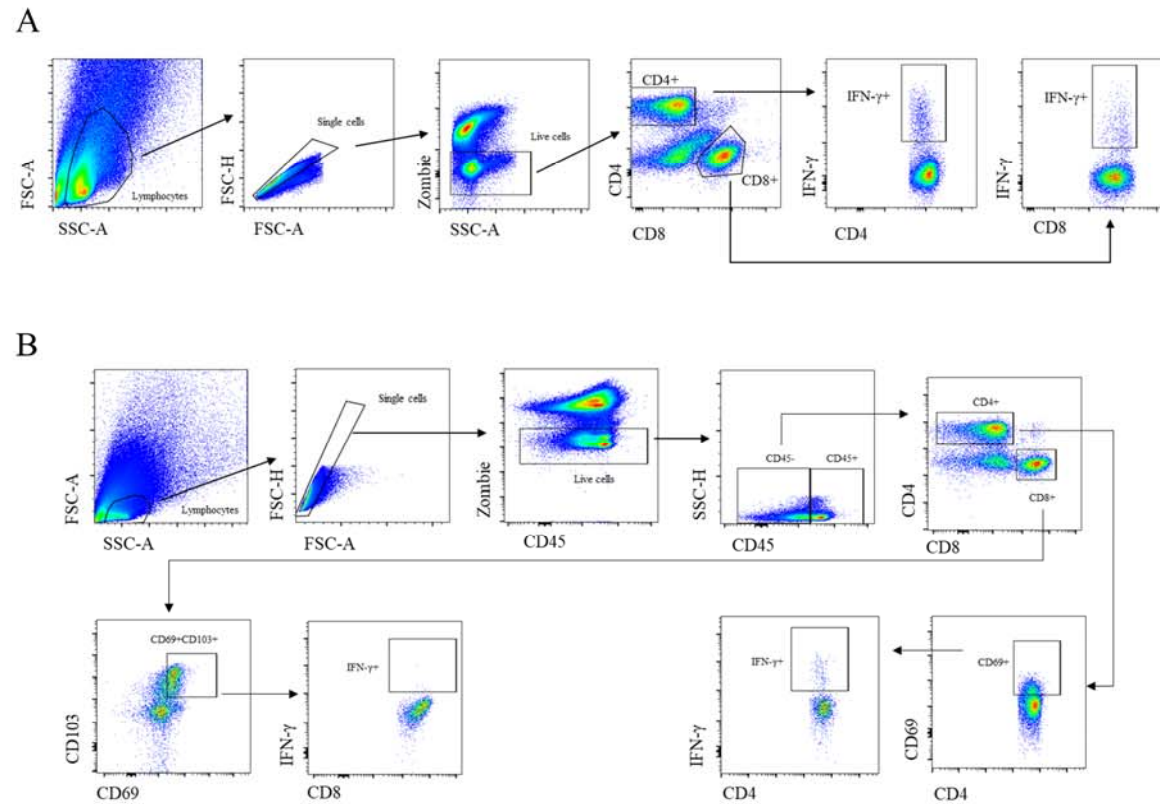

**Fig. S7 Flow cytometry gating strategy.**

The cells were stimulated by a SARS-CoV-2 RBD or influenza-NP peptide pool (Supplementary Table 2), stained for cell surface markers and intracellular cytokines and flow cytometry performed with gating with FSC-A vs SSC-A to exclude debris, then FSC-H vs FSC-A to select single cells, and then gating with Zombie vs SSC-A or CD45 for live cells. (A) Gating strategies to identify acute phase IFN- $\gamma$ <sup>+</sup> CD4<sup>+</sup> T cells and IFN- $\gamma$ <sup>+</sup> CD8<sup>+</sup> T cells in lungs. (B) Gating strategies to identify memory phase CD45<sup>-</sup> IFN- $\gamma$ <sup>+</sup> CD69<sup>+</sup> CD4<sup>+</sup> T cells and CD45<sup>-</sup> IFN- $\gamma$ <sup>+</sup> CD69<sup>+</sup> CD103<sup>+</sup> CD8<sup>+</sup> T cells in lungs 5 weeks after immunization.

# Supplementary Table 1

**Table S1. Mouse adaptations present in plaque purified SARS-CoV-2 Gamma-MA and Omicron-MA relative to the parental SARS-CoV-2 strain. NSP, nonstructural protein.**

| Gamma-MA |       |               | Omicron-MA |       |               |
|----------|-------|---------------|------------|-------|---------------|
| Mutation | Gene  | Coding Change | Mutation   | Gene  | Coding Change |
| A10458G  | NSP5  | D153G         | A9489G     | NSP4  | H313R         |
| C12060T  | NSP8  | S8F           | T10931C    | NSP5  | F294L         |
| T21706A  | Spike | H66Q          | G19468A    | NSP14 | G481S         |
| A22743C  | Spike | K417T         | C23913T    | Spike | T791I         |
|          |       |               | C28289T    | N     | L13F          |

## Supplementary Table 1

**Table S2. List detailing the SARS-CoV-2 RBD peptide pool (15-mers overlapping by 11 residues, spanning the RBD sequence of Spike (331-531)) used in this study.**

| Peptide |                  | Delta4N | Omi4N | Peptide |                     | Delta4N | Omi4N                      |
|---------|------------------|---------|-------|---------|---------------------|---------|----------------------------|
| 1       | NLCPFGEVFNATRFA  |         |       | 24      | PDD*FTGCVIAWNSNN*   | D428N   | D428N,N440K                |
| 2       | FGEVFNATRFASVYA  |         |       | 25      | TGCVIAWNSNN*LDSK    |         | N440K                      |
| 3       | FNATRFASVYAWNRK  |         |       | 26      | IAWNSNN*LDSKVG*GN   |         | N440K,G446S                |
| 4       | RFASVYAWNRKRISN  |         |       | 27      | SNN*LDSKVG*GNYNYL*  | L452R   | N440K,G446S                |
| 5       | VYAWNRKRISNCVAD  |         |       | 28      | DSKVG*GNYNYL*YRLF   | L452R   | G446S                      |
| 6       | NRKRISNCVADYSVL  |         |       | 29      | G*GNYNYL*YRLFRKSN   | L452R   | G446S                      |
| 7       | ISNCVADYSVLYNSA* | A372T   | A372T | 30      | NYL*YRLFRKSNLKP     | L452R   |                            |
| 8       | VADYSVLYNSA*SFST | A372T   | A372T | 31      | RLFRKSNLKPFRDI      |         |                            |
| 9       | SVLYNSA*SFSTFKCY | A372T   | A372T | 32      | KSNLKPFRDISTEI      |         |                            |
| 10      | NSASFSTFKCYGVSP  |         |       | 33      | KPFRDISTEIQAG       |         |                            |
| 11      | FSTFKCYGVSPTKLN  |         |       | 34      | RDISTEIQAGS*T*PC    | T478K   | S477N, T478K               |
| 12      | KCYGVSPTKLNDLCF  |         |       | 35      | TEIQAGS*T*PCNGVE*   | T478K   | S477N, T478K, E484A        |
| 13      | VSPTKLNDLCFTNVY  |         |       | 36      | QAGS*T*PCNGVE*GFNC  | T478K   | S477N, T478K, E484A        |
| 14      | KLNDLCFTNVYADSF  |         |       | 37      | T*PCNGVE*GFNCYFPL   | T478K   | T478K, E484A               |
| 15      | LCFTNVYADSFVIRG  |         |       | 38      | GVE*GFNCYFPLO*SYG*  |         | E484A, Q493R, G496S        |
| 16      | NVYADSFVIRGDEVR  |         |       | 39      | FNCYFPLO*SYG*FQ*PT  |         | Q493R, G496S, Q498R        |
| 17      | DSFVIRGDEVRQIAP  |         |       | 40      | FPLQ*SYG*FQ*PTN*GVG |         | Q493R, G496S, Q498R, N501Y |
| 18      | IRGDEVRQIAPG*QTG | G413N   | G413N | 41      | SYG*FQ*PTN*GVGY*QPY |         | G496S, Q498R, N501Y, Y505H |
| 19      | EVRQIAPG*QTGKIAD | G413N   | G413N | 42      | Q*PTN*GVGY*QPYRVVV  |         | Q498R, N501Y, Y505H        |
| 20      | IAPG*QTGKIADYNYK | G413N   | G413N | 43      | GVGY*QPYRVVLSFE     |         | Y505H                      |
| 21      | QTGKIADYNYKLPDD* | D428N   | D428N | 44      | QPYRVVLSFELLHA      |         |                            |
| 22      | IADYNYKLPDD*FTGC | D428N   | D428N | 45      | VVLSFELLHAP*ATV     | P521N   | P521N                      |
| 23      | NYKLPDD*FTGCVIAW | D428N   | D428N | 46      | SFELLHAP*ATVCGPK    | P521N   | P521N                      |

\* Variations in Delta4N and Omi4N from the sequences of the peptide pool are indicated in the table.
